# Supplementary material for: Atomically-dispersed cobalt ions on polyphenol-derived nanocarbon layers to improve charge separation, hole storage, and catalytic activity of water-oxidation photoanodes
Source: Royal Society of Chemistry journal article supplement (doi:10.1039/d1ta01852c), 2021-01-01
Supplement: d1ta01852c1.pdf [file d1ta01852c1.pdf]

Electronic Supplementary Information

# Atomically-Dispersed Cobalt Ions on Polyphenol-Derived Nanocarbon Layers to Improve Charge Separation, Hole Storage, and Catalytic Activity of Water-Oxidation Photoanodes

*Yuri Choi,<sup>‡ab</sup> Sanghyun Bae,<sup>‡ab</sup> Byeong-Su Kim<sup>\*c</sup> and Jungki Ryu<sup>\*ab</sup>*

<sup>a</sup>Department of Energy Engineering, School of Energy and Chemical Engineering, Ulsan National Institute of Science and Technology (UNIST), Ulsan 44919, Republic of Korea

<sup>b</sup>Emergent Hydrogen Technology R&D Center, Ulsan National Institute of Science and Technology (UNIST), Ulsan 44919, Republic of Korea

<sup>c</sup>Department of Chemistry, Yonsei University, Seoul 03722, Republic of Korea

<sup>‡</sup>These authors contributed equally to this work.

E-mail: jryu@unist.ac.kr (J.R); bskim19@yonsei.ac.kr (B.-S.K)

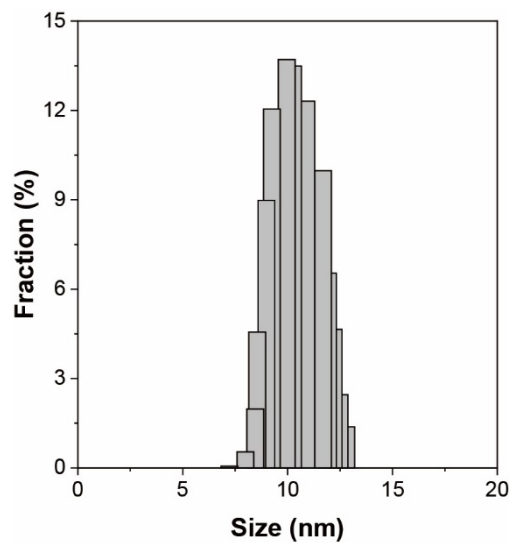

**Fig. S1** Dynamic light scattering of N-TAGQDs. The average N-TAGQD size was 10.5 nm.

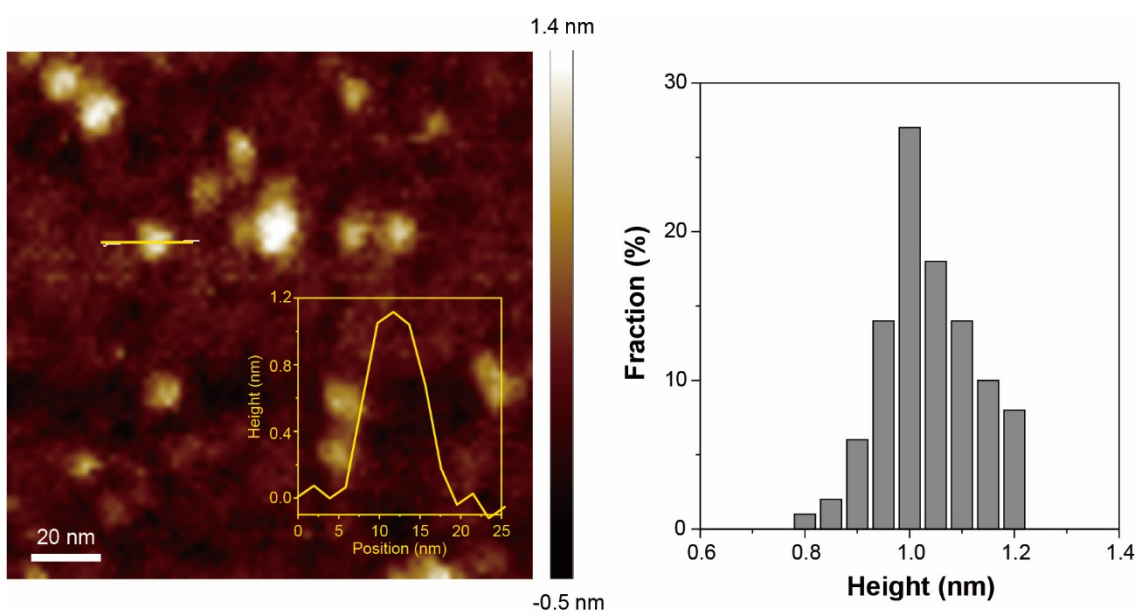

**Fig. S2** Representative AFM image of N-TAGQDs. The average N-TAGQD thickness was ~1.1 nm.

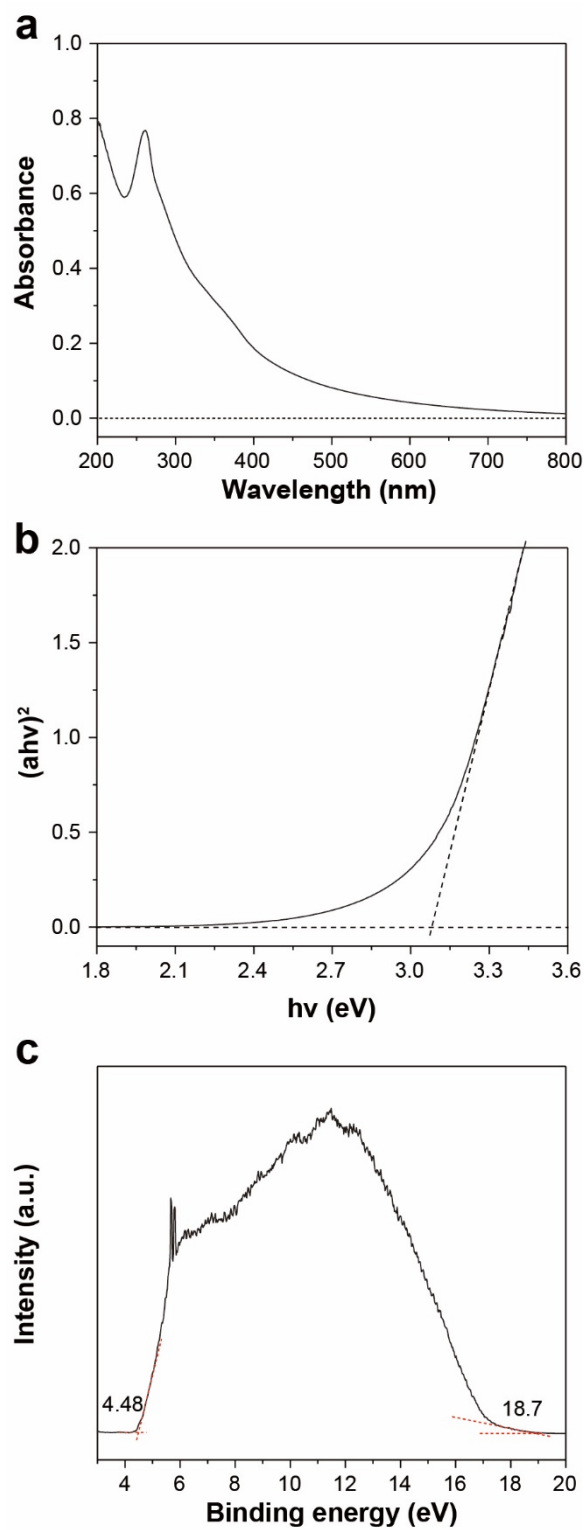

**Fig. S3** (a) UV-Vis absorbance, (b) Tauc plot, and (c) UPS spectra of N-TAGQDs.

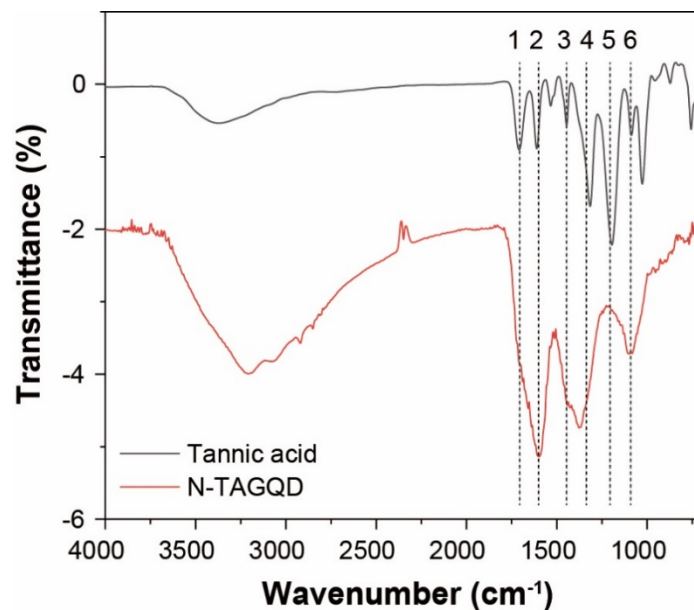

**Fig. S4** FT-IR spectrum of TA and N-TAGQDs. The peaks related with TA were 1707 (1, C=O stretching), 1610 (2, C-C and C-H deformation in the benzene ring plane), 1449 (3, C=C stretch of the benzene ring, C-O stretch of phenolic groups), 1317 (4, C-O stretch and O-H deformation of phenolic groups, C-C stretch and C-H deformation in the benzene ring plane), 1196 (5, O-H deformation in the phenolic plane), and 1084  $\text{cm}^{-1}$  (6, C-O stretch of phenolic groups). Although the intensity of C-OH peaks was reduced, those peaks related to phenolate still remained after hydrothermal reaction.

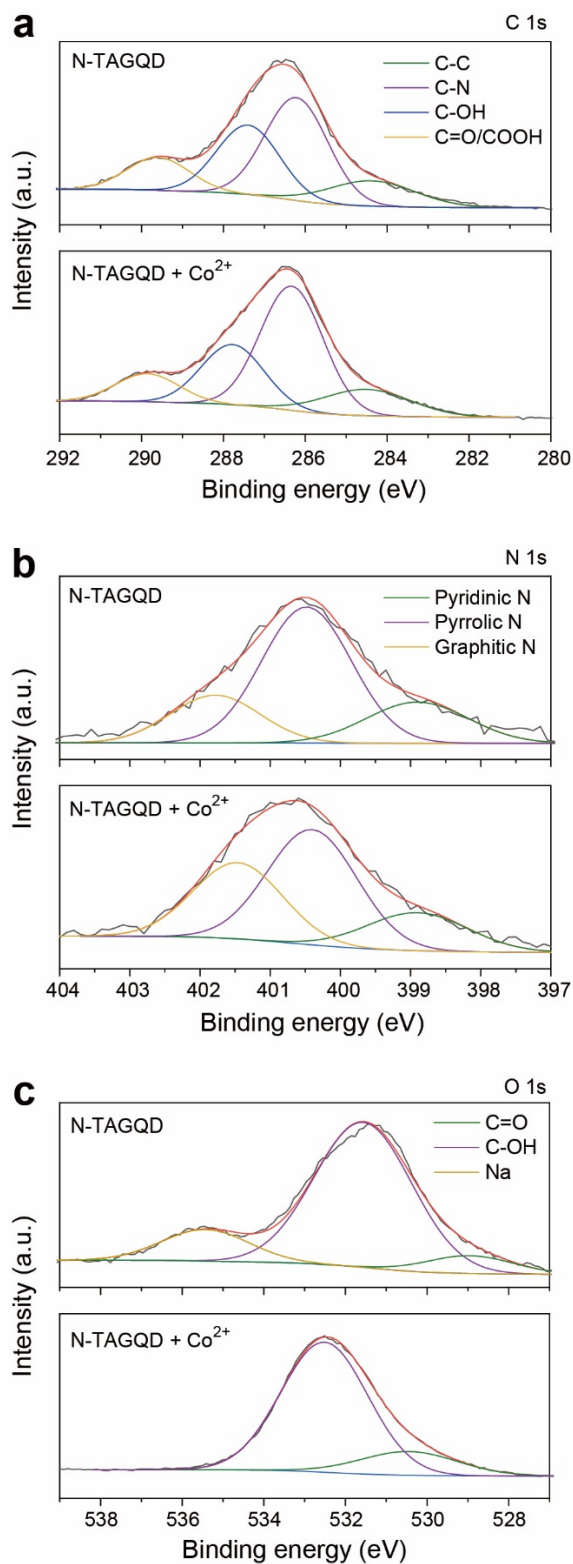

**Fig. S5** High resolution XPS spectra of (a) C 1s, (b) N 1s, and (c) O 1s of N-TAGQDs and N-TAGQDs + Co<sup>2+</sup> ions. After N-TAGQDs and Co<sup>2+</sup> ions were mixed, the ratio of phenolic groups and pyrrolic N was reduced due to the conjugation of the abundant functional groups of N-TAGQDs and Co<sup>2+</sup> ions.

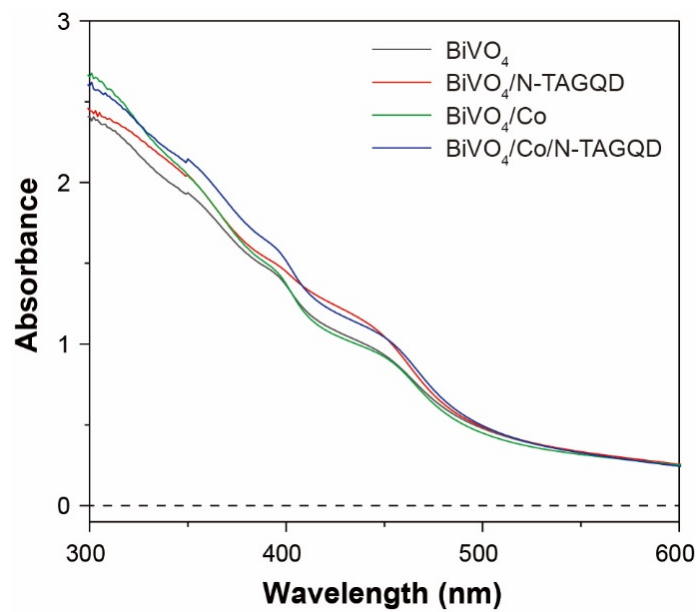

**Fig. S6** UV/Vis spectra of  $\text{BiVO}_4$ ,  $\text{BiVO}_4/\text{N-TAGQD}$ ,  $\text{BiVO}_4/\text{Co}$ , and  $\text{BiVO}_4/\text{Co/N-TAGQD}$ .

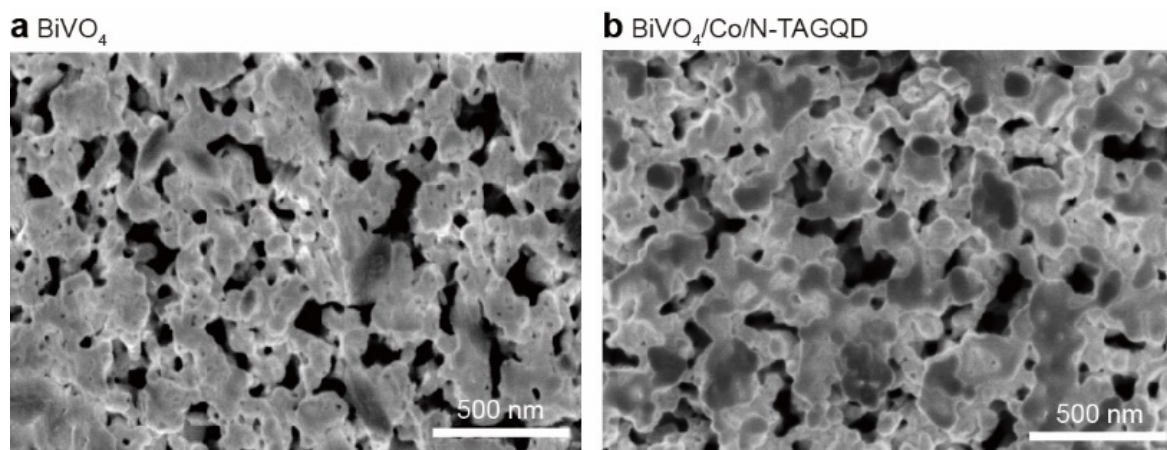

**Fig. S7** SEM images of (a)  $\text{BiVO}_4$  and (b)  $\text{BiVO}_4/\text{Co/N-TAGQD}$ .

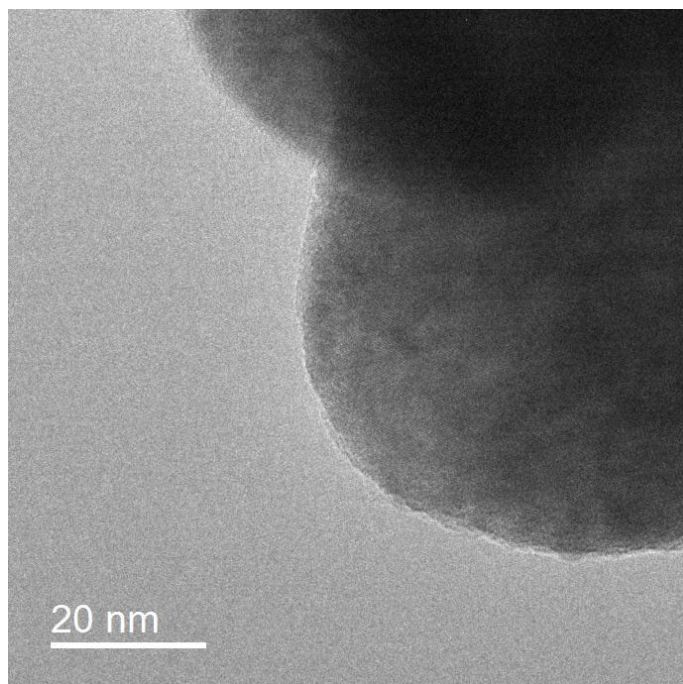

**Fig. S8** TEM image of BiVO<sub>4</sub>/N-TAGQD.

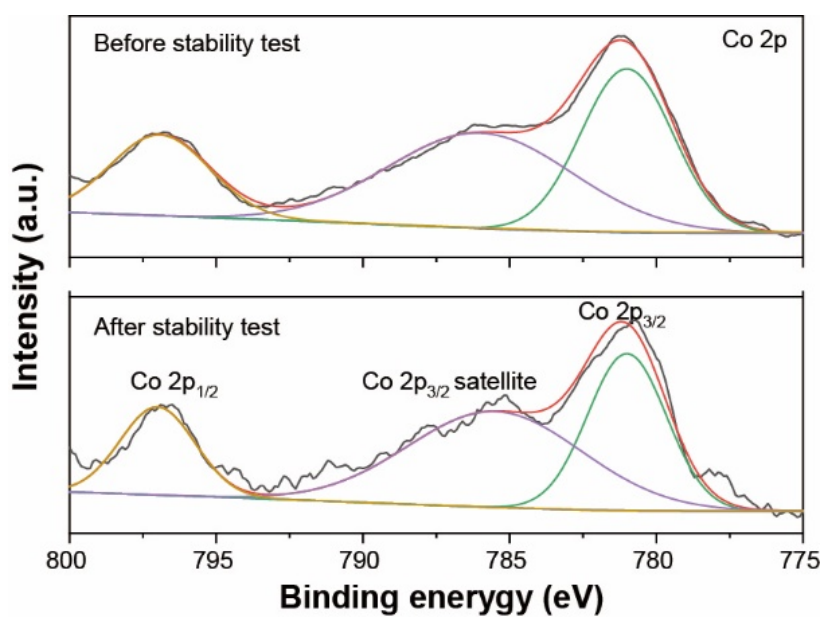

**Fig. S9** High-resolution Co 2p XPS spectra of BiVO<sub>4</sub>/Co/N-TAGQD before and after stability test. The content of Co<sup>2+</sup> was 2.41 wt%. Three peaks at 780.7, 785.9, and 796.6 eV correspond to Co 2p<sub>3/2</sub>, Co 2p<sub>3/2</sub> satellite, Co 2p<sub>1/2</sub> peaks (the Co 2p<sub>1/2</sub> satellite signal is not assigned due to its overlap with the BiVO<sub>4</sub> signal).



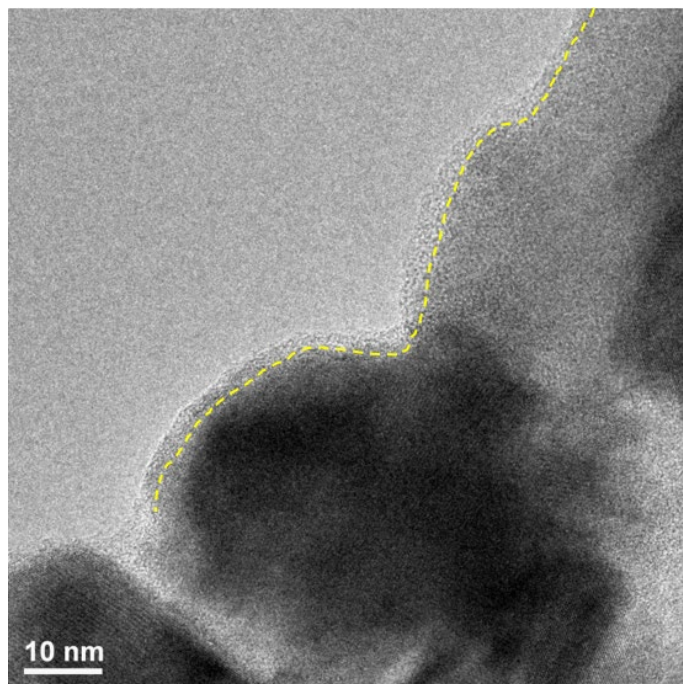

**Fig. S10** TEM image of BiVO<sub>4</sub>/Co/N-TAGQD after stability test for 2 h.

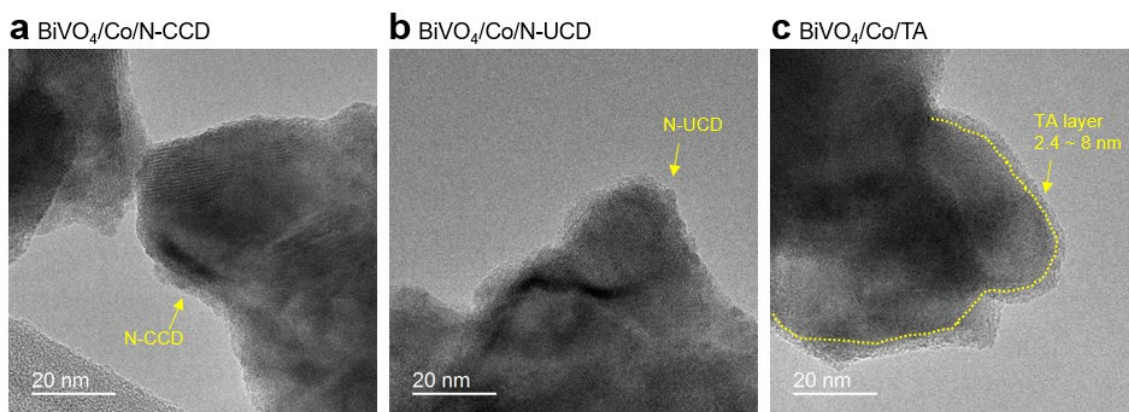

**Fig. S11** TEM images of (a) BiVO<sub>4</sub>/Co/N-UCD, (b) BiVO<sub>4</sub>/Co/N-CCD, and (c) BiVO<sub>4</sub>/Co/TA.



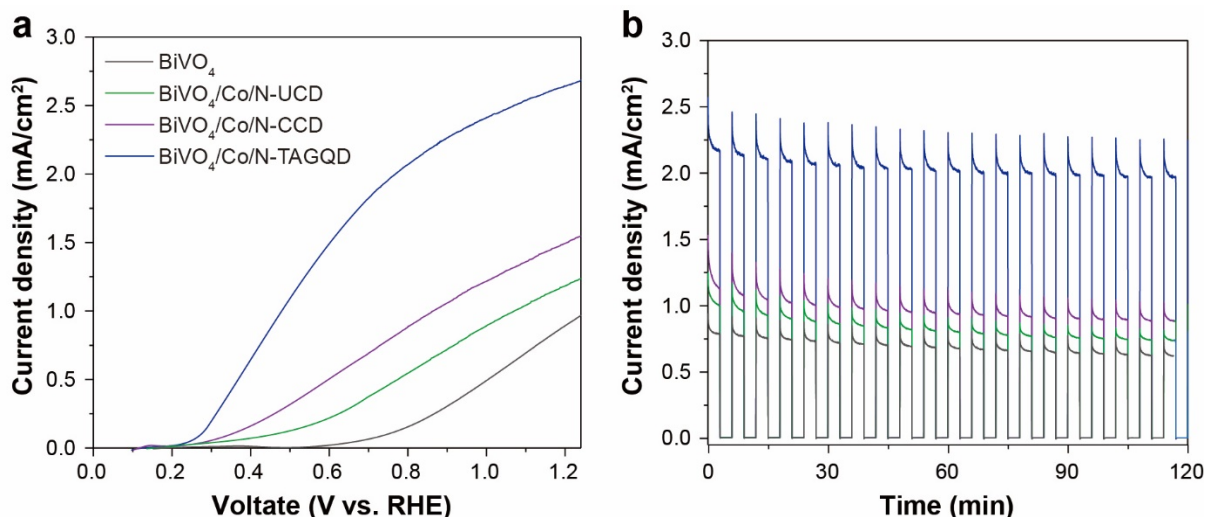

**Fig. S12** (a) PEC performance of BiVO<sub>4</sub>, BiVO<sub>4</sub>/Co/N-UCD, BiVO<sub>4</sub>/Co/N-CCD, and BiVO<sub>4</sub>/Co/N-TAGQD photoanodes under simulated solar irradiation in 0.1 M phosphate buffer (pH 7.0). Scan rate: 10 mV/s. (b) Chronoamperometry curves of BiVO<sub>4</sub>, BiVO<sub>4</sub>/Co/N-UCD, BiVO<sub>4</sub>/Co/N-CCD, and BiVO<sub>4</sub>/Co/N-TAGQD collected at 1.23 V vs. RHE with the chopped light.

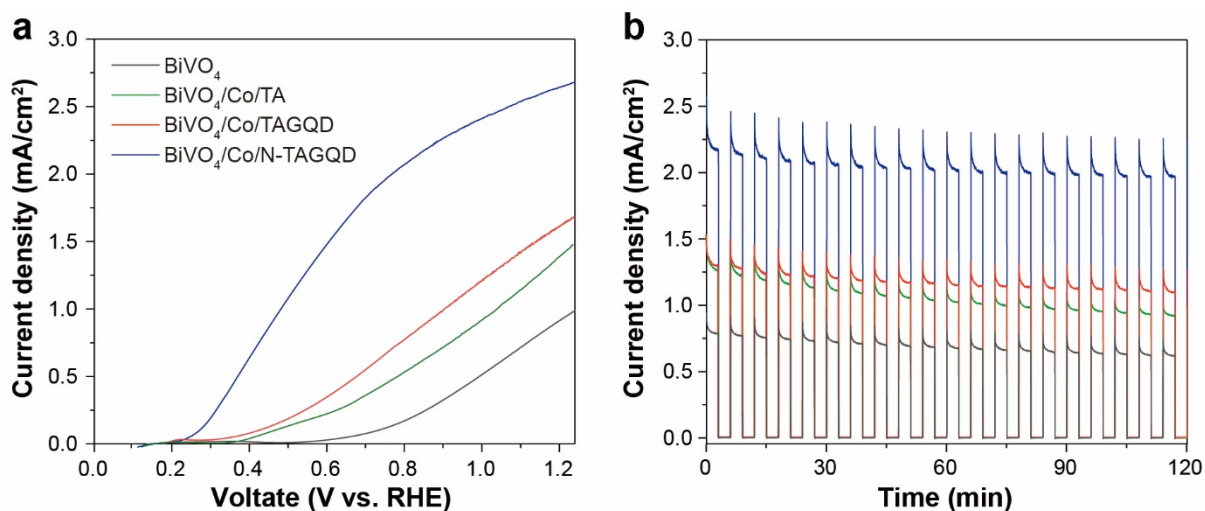

**Fig. S13** (a) PEC performance of BiVO<sub>4</sub>, BiVO<sub>4</sub>/Co/TA, BiVO<sub>4</sub>/Co/TAGQD, and BiVO<sub>4</sub>/Co/N-TAGQD photoanodes under simulated solar irradiation in 0.1 M phosphate buffer (pH 7.0). Scan rate: 10 mV/s. (b) Chronoamperometry curves of BiVO<sub>4</sub>, BiVO<sub>4</sub>/Co/TA, BiVO<sub>4</sub>/Co/TAGQD, and BiVO<sub>4</sub>/Co/N-TAGQD collected at 1.23 V vs. RHE with chopped light.

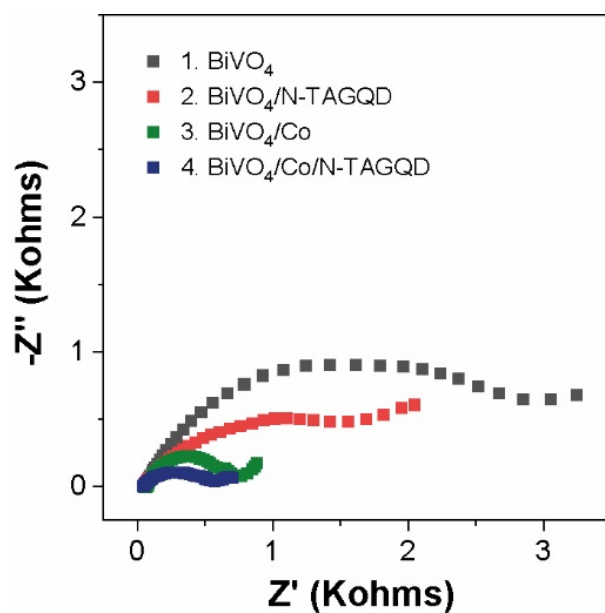

**Fig. S14** Nyquist plot of (1) BiVO<sub>4</sub>, (2) BiVO<sub>4</sub>/N-TAGQD, (3) BiVO<sub>4</sub>/Co, and (4) BiVO<sub>4</sub>/Co/N-TAGQD photoanodes at 0.6 V vs. RHE under light irradiation.

**Table S1** The fitting parameters obtained from EIS analysis at 0.6 V vs. RHE.

| No. | Photoanode                    | R <sub>s</sub><br>(Ω cm <sup>-2</sup> ) | C <sub>sc</sub><br>(F cm <sup>-2</sup> ) | R <sub>bulk</sub><br>(Ω cm <sup>-2</sup> ) | C <sub>ss</sub><br>(F cm <sup>-2</sup> ) | R <sub>ct</sub><br>(Ω cm <sup>-2</sup> ) |
|-----|-------------------------------|-----------------------------------------|------------------------------------------|--------------------------------------------|------------------------------------------|------------------------------------------|
| 1   | BiVO <sub>4</sub>             | 61.34                                   | 1.34e-5                                  | 444.4                                      | 3.87e-5                                  | 2007                                     |
| 2   | BiVO <sub>4</sub> /N-TAGQD    | 48.88                                   | 1.20e-5                                  | 269.5                                      | 8.28e-5                                  | 1159                                     |
| 3   | BiVO <sub>4</sub> /Co         | 73.11                                   | 1.10e-5                                  | 220.6                                      | 5.93e-5                                  | 382                                      |
| 4   | BiVO <sub>4</sub> /Co/N-TAGQD | 42.12                                   | 1.06e-5                                  | 191.6                                      | 9.98e-5                                  | 232                                      |

**Table S2** The fitting parameters obtained from the Bode plots in Figure 3b.

| <b>Photoanode</b>             | <b>Charge transfer</b>     |                       | <b>Charge transport</b>    |                       |
|-------------------------------|----------------------------|-----------------------|----------------------------|-----------------------|
|                               | <b>Phase angle<br/>(°)</b> | <b>Log f<br/>(Hz)</b> | <b>Phase angle<br/>(°)</b> | <b>Log f<br/>(Hz)</b> |
| BiVO <sub>4</sub>             | 47.46                      | -0.077                | 31.80                      | 1.76                  |
| BiVO <sub>4</sub> /N-TAGQD    | 49.72                      | -0.001                | 19.36                      | 2.37                  |
| BiVO <sub>4</sub> /Co         | 27.23                      | 0.425                 | 28.37                      | 1.90                  |
| BiVO <sub>4</sub> /Co/N-TAGQD | 6.92                       | 0.892                 | 25.96                      | 2.47                  |

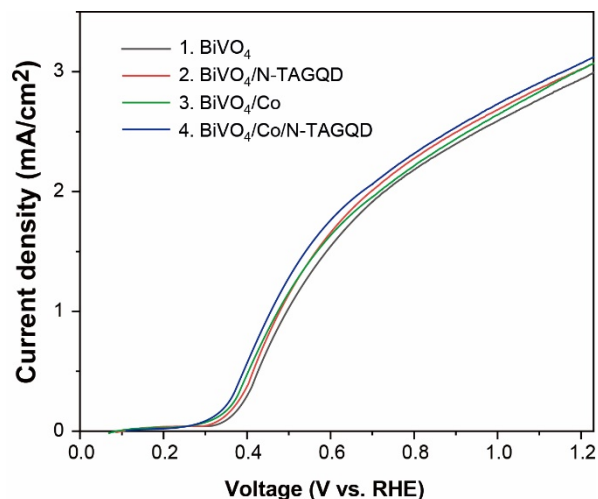

**Fig. S15** LSV curves measured in the presence of electron donor ( $\text{Na}_2\text{SO}_3$ ): (1)  $\text{BiVO}_4$ , (2)  $\text{BiVO}_4/\text{N-TAGQD}$ , (3)  $\text{BiVO}_4/\text{Co}$ , and (4)  $\text{BiVO}_4/\text{Co/N-TAGQD}$ .

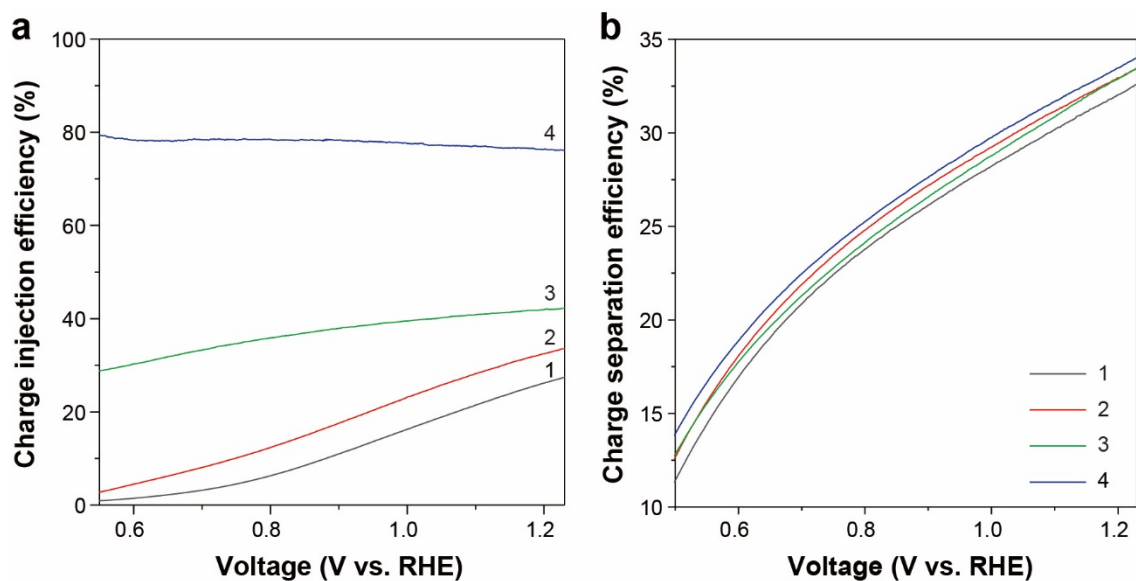

**Fig. S16** (a) Charge injection efficiency and (b) charge separation efficiency of (1)  $\text{BiVO}_4$ , (2)  $\text{BiVO}_4/\text{N-TAGQD}$ , (3)  $\text{BiVO}_4/\text{Co}$ , and (4)  $\text{BiVO}_4/\text{Co/N-TAGQD}$ .

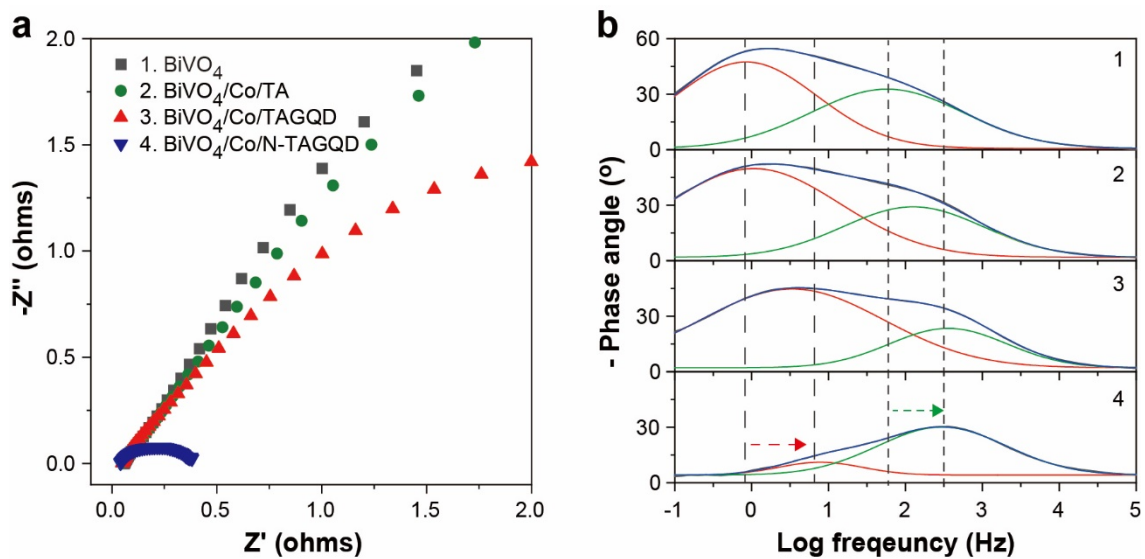

**Fig. S17** EIS (a) Nyquist and (b) Bode plot analyses of  $\text{BiVO}_4$ ,  $\text{BiVO}_4/\text{Co/TA}$ ,  $\text{BiVO}_4/\text{Co/TAGQD}$  and  $\text{BiVO}_4/\text{Co/N-TAGQD}$  measured at 0.4 V vs. RHE under simulated solar irradiation in 0.1 M phosphate buffer (pH 7.0).

**Table S3** The fitting parameters obtained from EIS and Bode plots.

| <b>EIS plots</b>              |                                       |                                    |                                            |                                    |                                          |
|-------------------------------|---------------------------------------|------------------------------------|--------------------------------------------|------------------------------------|------------------------------------------|
| <b>Photoanode</b>             | $R_s$<br>( $\Omega \text{ cm}^{-2}$ ) | $C_{sc}$<br>( $\text{F cm}^{-2}$ ) | $R_{bulk}$<br>( $\Omega \text{ cm}^{-2}$ ) | $C_{ss}$<br>( $\text{F cm}^{-2}$ ) | $R_{ct}$<br>( $\Omega \text{ cm}^{-2}$ ) |
| BiVO <sub>4</sub>             | 55.38                                 | 1.77e-5                            | 355.4                                      | 8.50e-5                            | 5651                                     |
| BiVO <sub>4</sub> /N-TAGQD    | 49.19                                 | 1.39e-5                            | 269.6                                      | 1.14e-4                            | 3929                                     |
| BiVO <sub>4</sub> /Co         | 50.01                                 | 1.50e-5                            | 245.9                                      | 8.55e-5                            | 912                                      |
| BiVO <sub>4</sub> /Co/TA      | 53.04                                 | 1.52e-5                            | 327.2                                      | 9.81e-5                            | 4147                                     |
| BiVO <sub>4</sub> /Co/TAGQD   | 48.39                                 | 1.77e-5                            | 330.4                                      | 1.02e-4                            | 2669                                     |
| BiVO <sub>4</sub> /Co/N-TAGQD | 42.86                                 | 5.40e-6                            | 121.6                                      | 6.70e-4                            | 181                                      |
| <b>Bode plots</b>             |                                       |                                    |                                            |                                    |                                          |
| <b>Photoanode</b>             | <b>Charge transfer</b>                |                                    | <b>Charge transport</b>                    |                                    |                                          |
|                               | <b>Phase angle</b><br>( $^\circ$ )    | <b>Log f</b><br>(Hz)               | <b>Phase angle</b><br>( $^\circ$ )         | <b>Log f</b><br>(Hz)               |                                          |
| BiVO <sub>4</sub>             | 47.46                                 | -0.077                             | 31.80                                      | 1.76                               |                                          |
| BiVO <sub>4</sub> /N-TAGQD    | 49.72                                 | -0.001                             | 19.36                                      | 2.37                               |                                          |
| BiVO <sub>4</sub> /Co         | 27.23                                 | 0.425                              | 28.37                                      | 1.90                               |                                          |
| BiVO <sub>4</sub> /Co/TA      | 47.92                                 | 0.261                              | 27.26                                      | 2.09                               |                                          |
| BiVO <sub>4</sub> /Co/TAGQD   | 42.56                                 | 0.528                              | 21.28                                      | 2.56                               |                                          |
| BiVO <sub>4</sub> /Co/N-TAGQD | 6.92                                  | 0.892                              | 25.96                                      | 2.47                               |                                          |

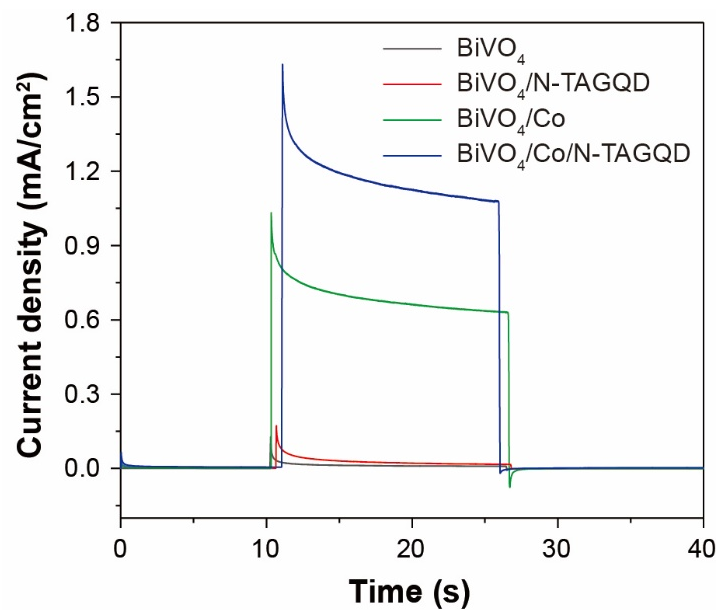

**Fig. S18** Chronoamperometry graphs of  $\text{BiVO}_4$ ,  $\text{BiVO}_4/\text{N-TAGQD}$ ,  $\text{BiVO}_4/\text{Co}$ , and  $\text{BiVO}_4/\text{Co}/\text{N-TAGQD}$  photoanodes with chopped light at 0.6 V vs. RHE.

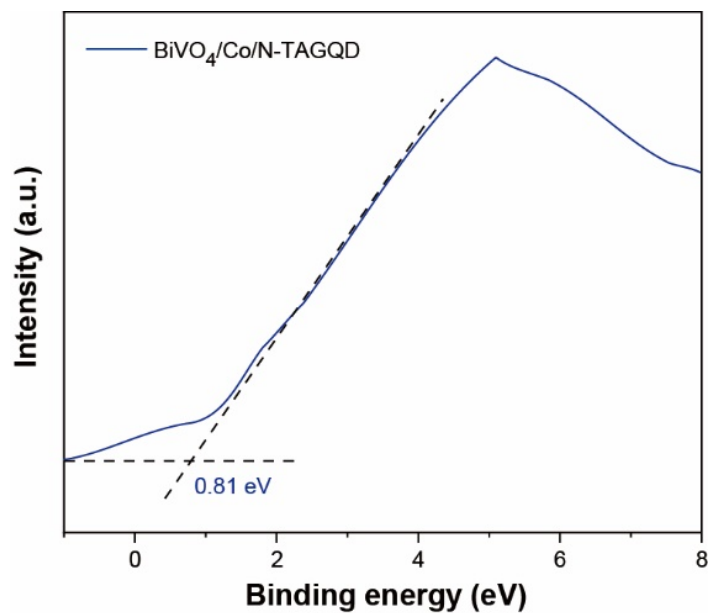

**Fig. S19** XPS of  $\text{BiVO}_4/\text{Co}/\text{N-TAGQD}$  photoanodes for investigation of the position of valence band maximum (VBM).



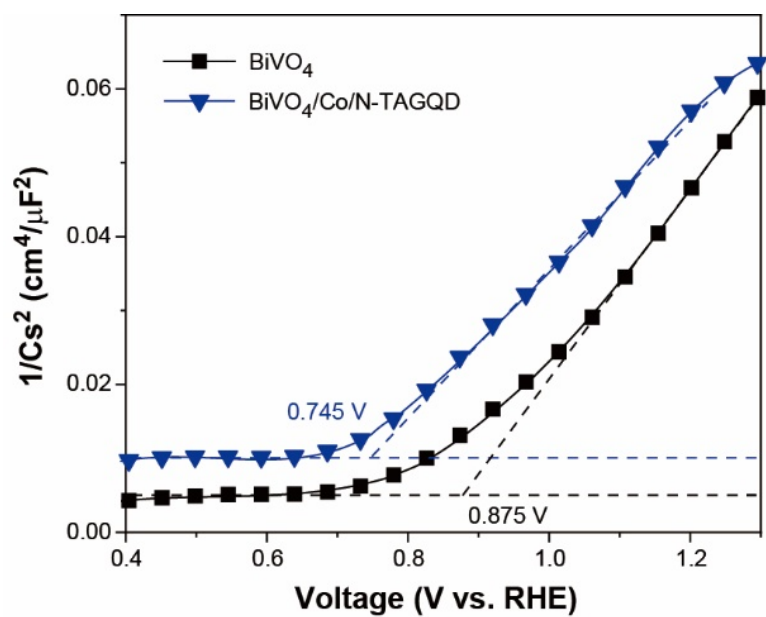

**Fig. S20** Mott-Schottky plot (M-S plot) of  $\text{BiVO}_4$ , and  $\text{BiVO}_4/\text{Co}/\text{N-TAGQD}$  photoanodes under dark condition in 0.10 M phosphate buffer (pH 7.0).
